# Supplementary material for: Proteogenomic analysis of psoriasis reveals discordant and concordant changes in mRNA and protein abundance
Source: PubMed Central journal article supplement (PMC4527112; doi:10.1186/s13073-015-0208-5), 2015-08-04

**PP/PN (LC-MS/MS)**

32

1

0.03

**Patient 1 (M, 47)**

**$r = 0.26$**

**$P = 8.13e-34$**

**(A)**

**PP/PN (RNA-seq)**

0

0.03

1

32

1024

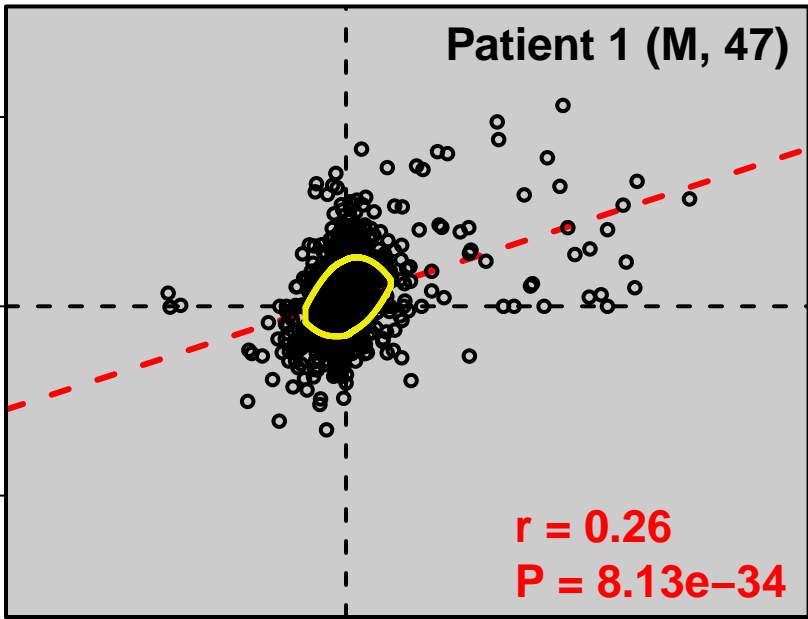

**PP/PN (LC-MS/MS)**

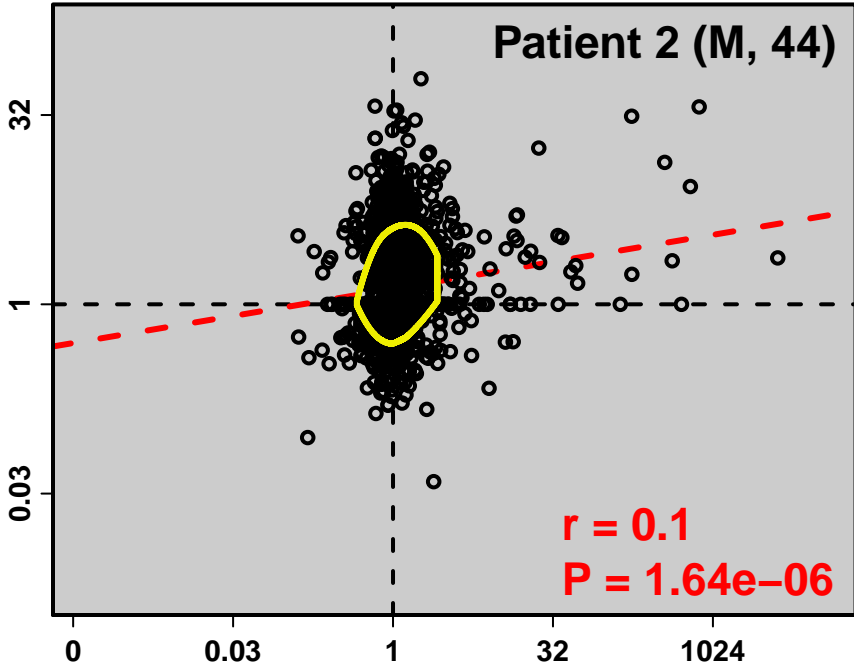

**(B)**

**PP/PN (RNA-seq)**

PP/PN (LC-MS/MS)

32

1

0.03

Patient 3 (M, 53)

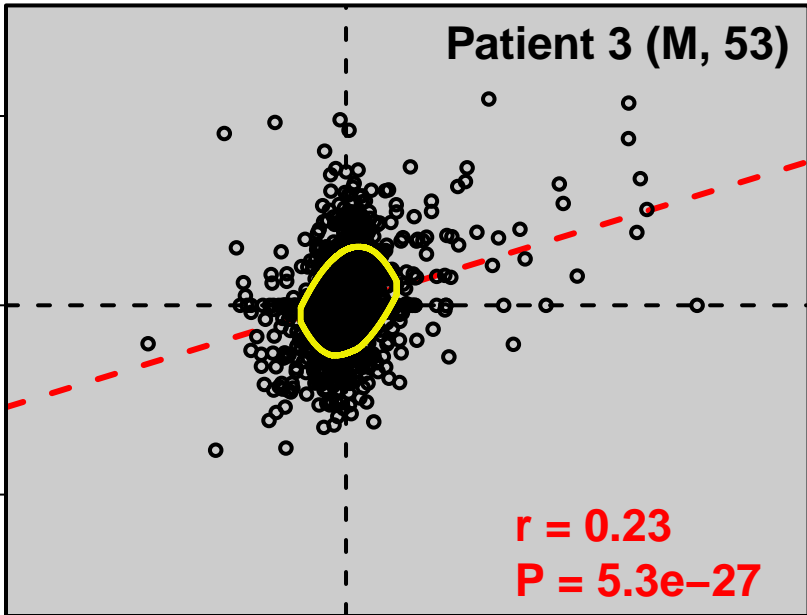

$r = 0.23$

$P = 5.3e-27$

0

0.03

1

32

1024

(C)

PP/PN (RNA-seq)

**PP/PN (LC-MS/MS)**

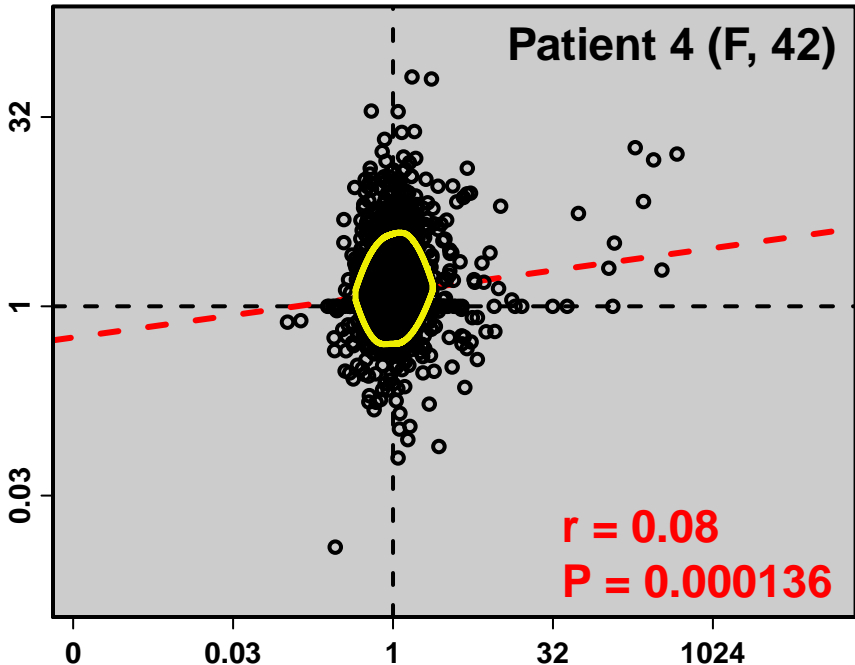

**(D)**

**PP/PN (RNA-seq)**

**PP/PN (LC-MS/MS)**

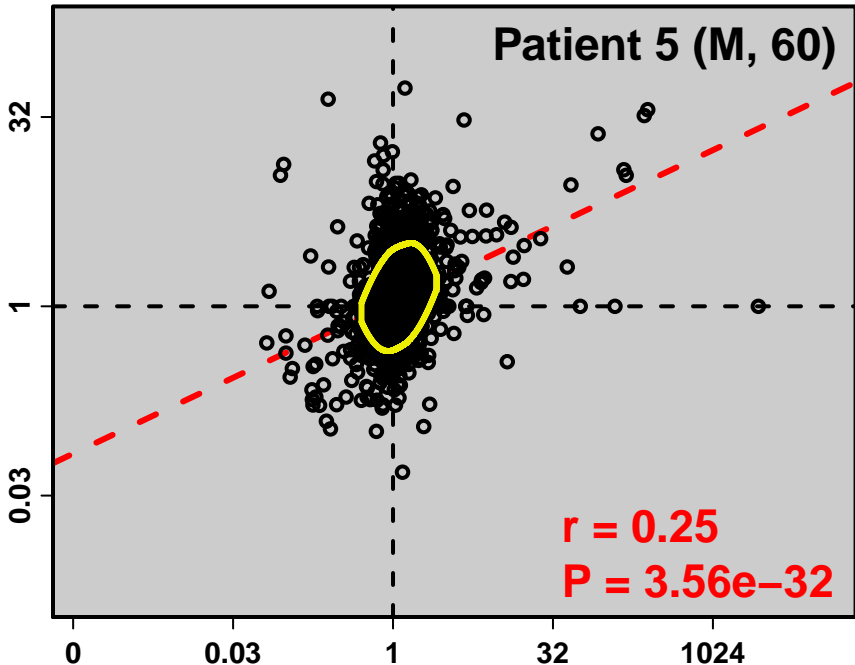

**(E)**

**PP/PN (RNA-seq)**

**PP/PN (LC-MS/MS)**

**(F)**

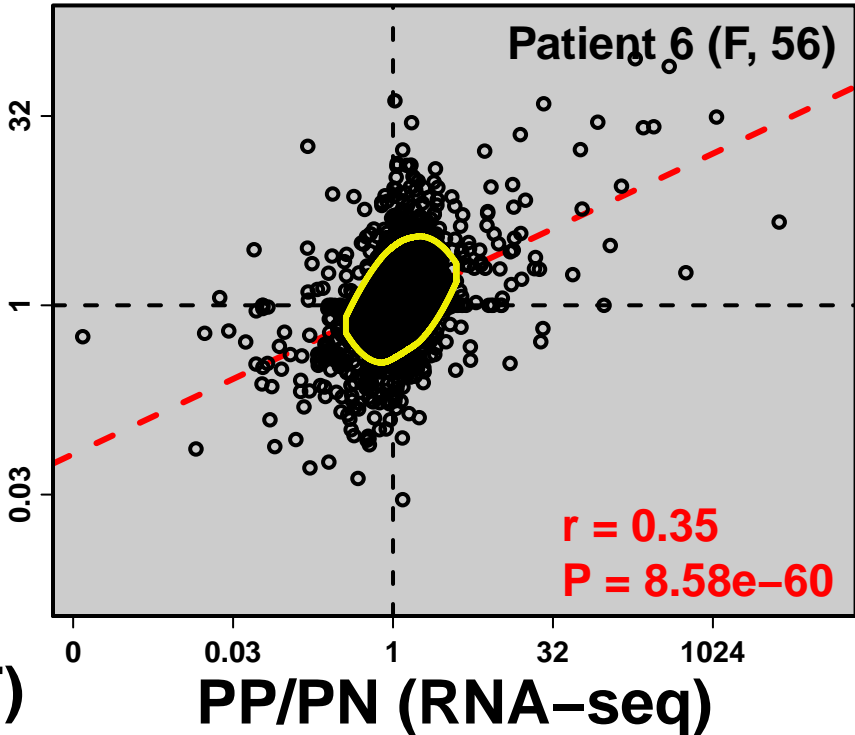

**PP/PN (LC-MS/MS)**

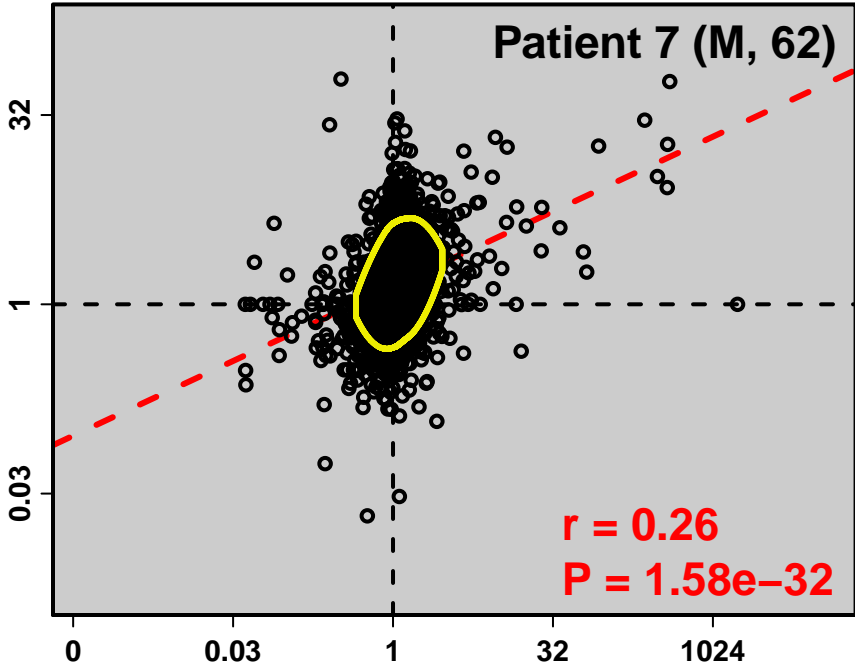

**(G)**

**PP/PN (RNA-seq)**

**PP/PN (LC-MS/MS)**

32

1

0.03

**Patient 8 (M, 52)**

**$r = 0.23$**

**$P = 3.2e-27$**

**(H)**

**PP/PN (RNA-seq)**

0

0.03

1

32

1024

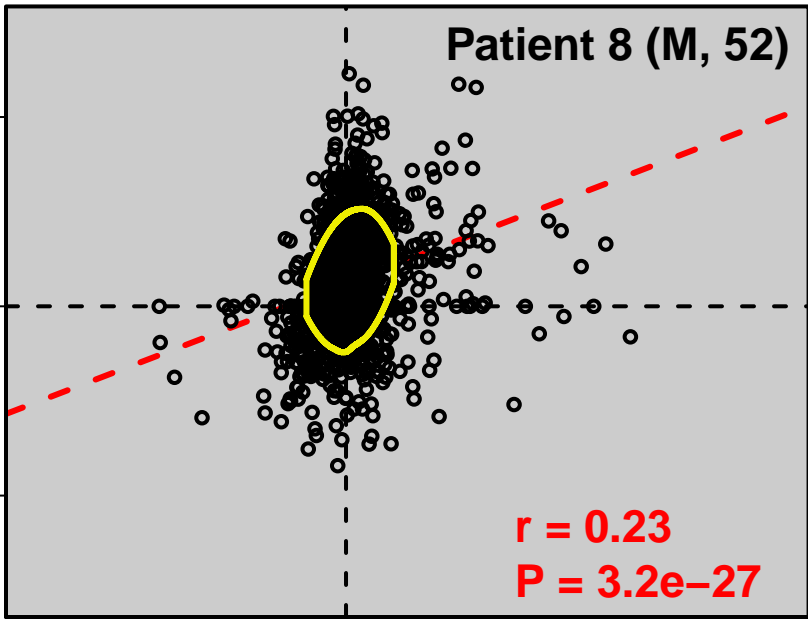



**PP/PN (LC-MS/MS)**

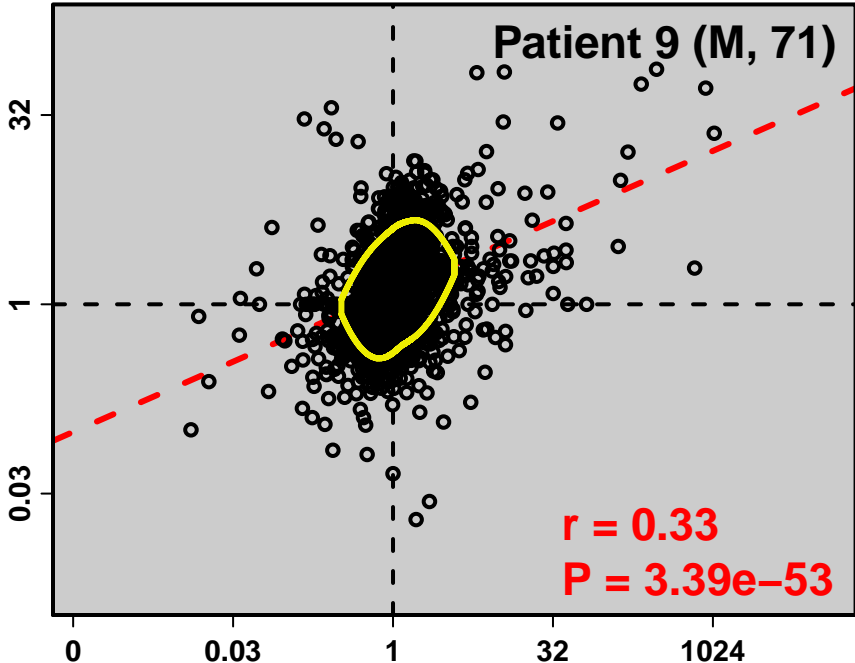

**(i)**

**PP/PN (RNA-seq)**

PP/PN (LC-MS/MS)

(J)

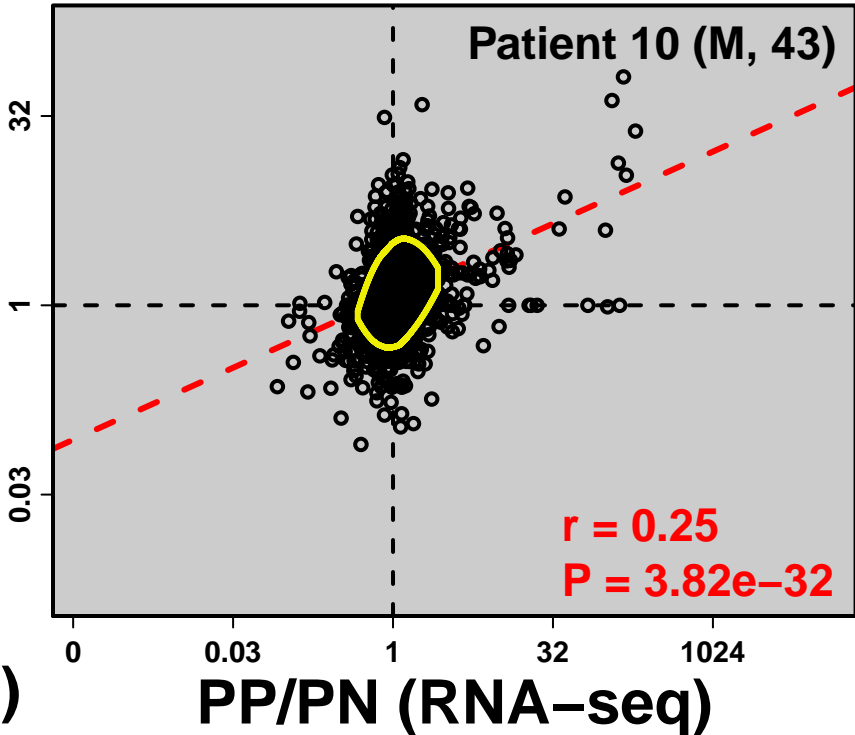

PP/PN (LC-MS/MS)

(K)

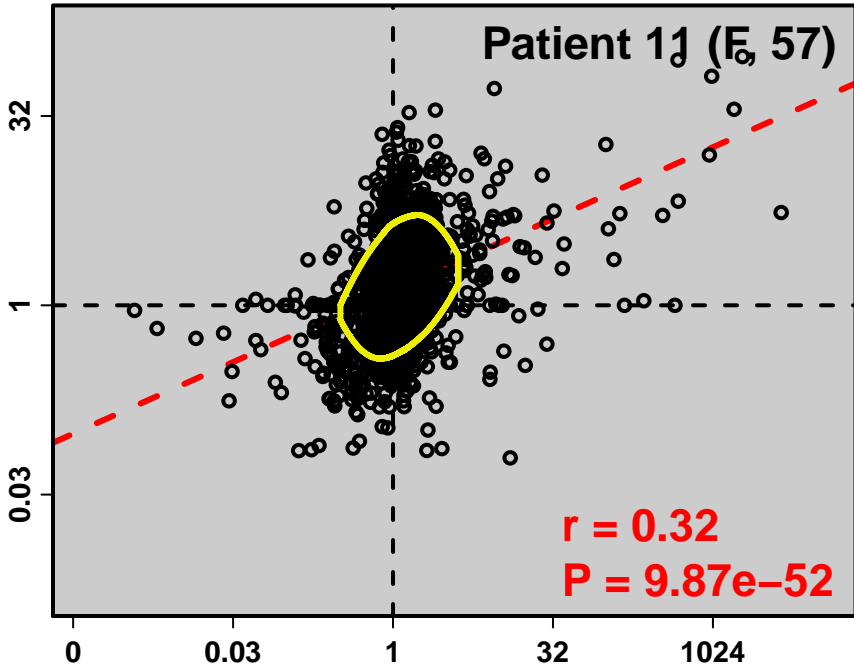

PP/PN (RNA-seq)

**PP/PN (LC-MS/MS)**

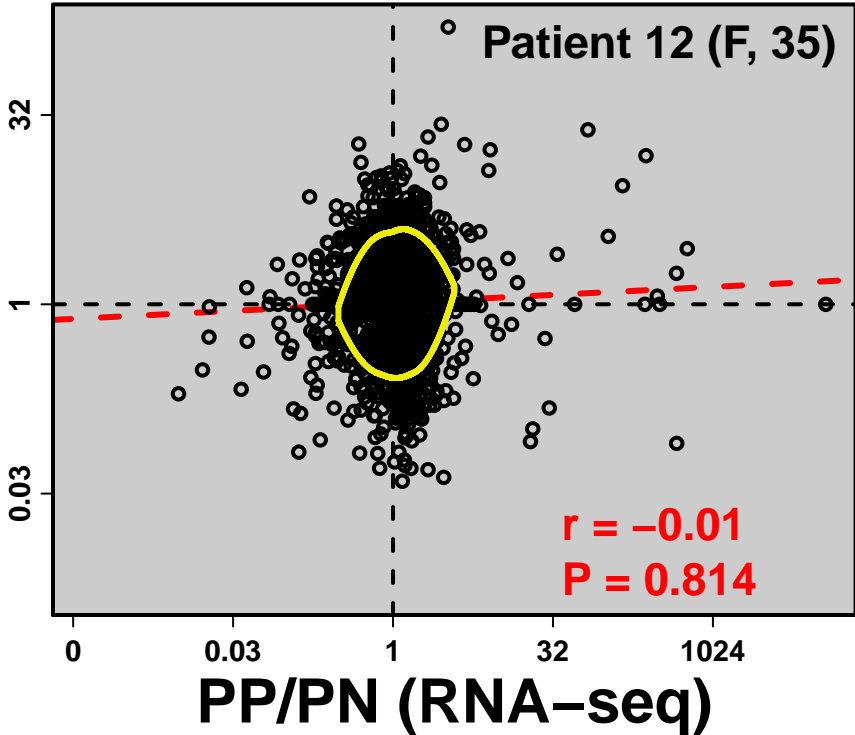

**PP/PN (LC-MS/MS)**

32

1

0.03

**Patient 13 (F, 42)**

0

0.03

1

32

1024

**PP/PN (RNA-seq)**

**$r = 0.13$**

**$P = 1.34e-09$**

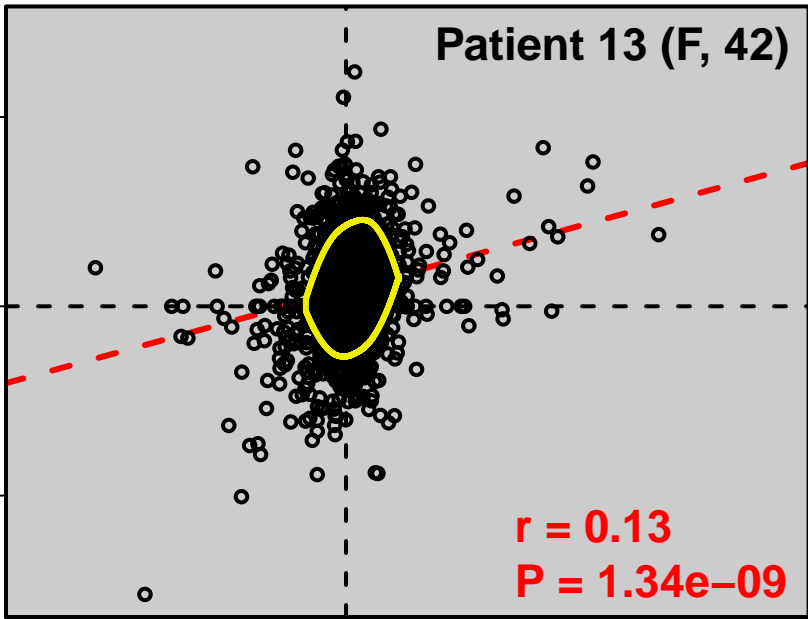

**PP/PN (LC-MS/MS)**

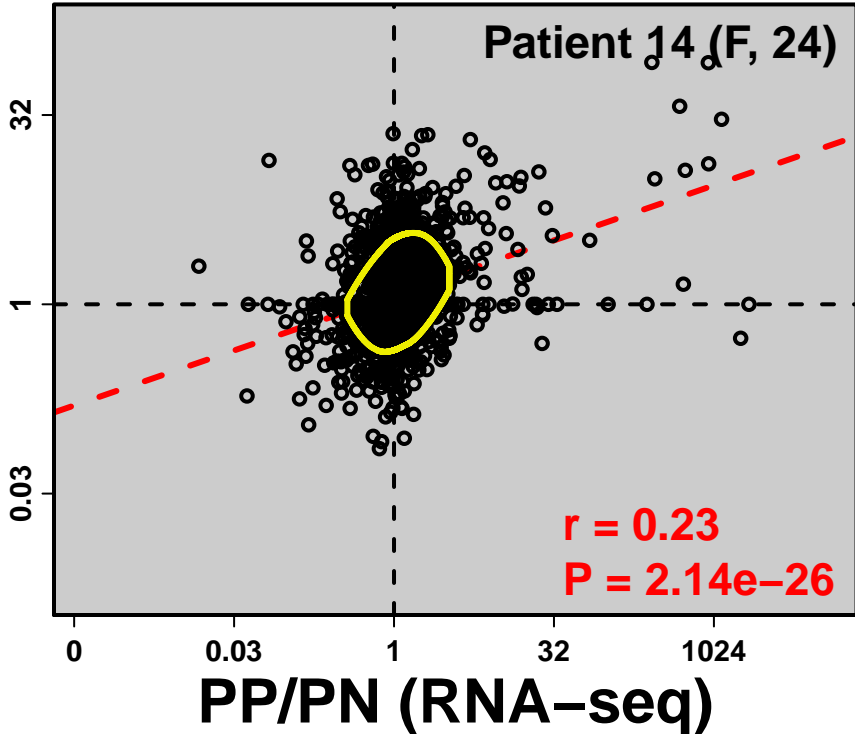

Supplement: 13073_2015_208_MOESM10_ESM.pdf [file 13073_2015_208_MOESM10_ESM.pdf]
