# Supplementary material for: Proteogenomic analysis of psoriasis reveals discordant and concordant changes in mRNA and protein abundance
Source: PubMed Central journal article supplement (PMC4527112; doi:10.1186/s13073-015-0208-5), 2015-08-04
Supplement: 13073_2015_208_MOESM17_ESM.pdf [file 13073_2015_208_MOESM17_ESM.pdf]

# KC cytokine treatments

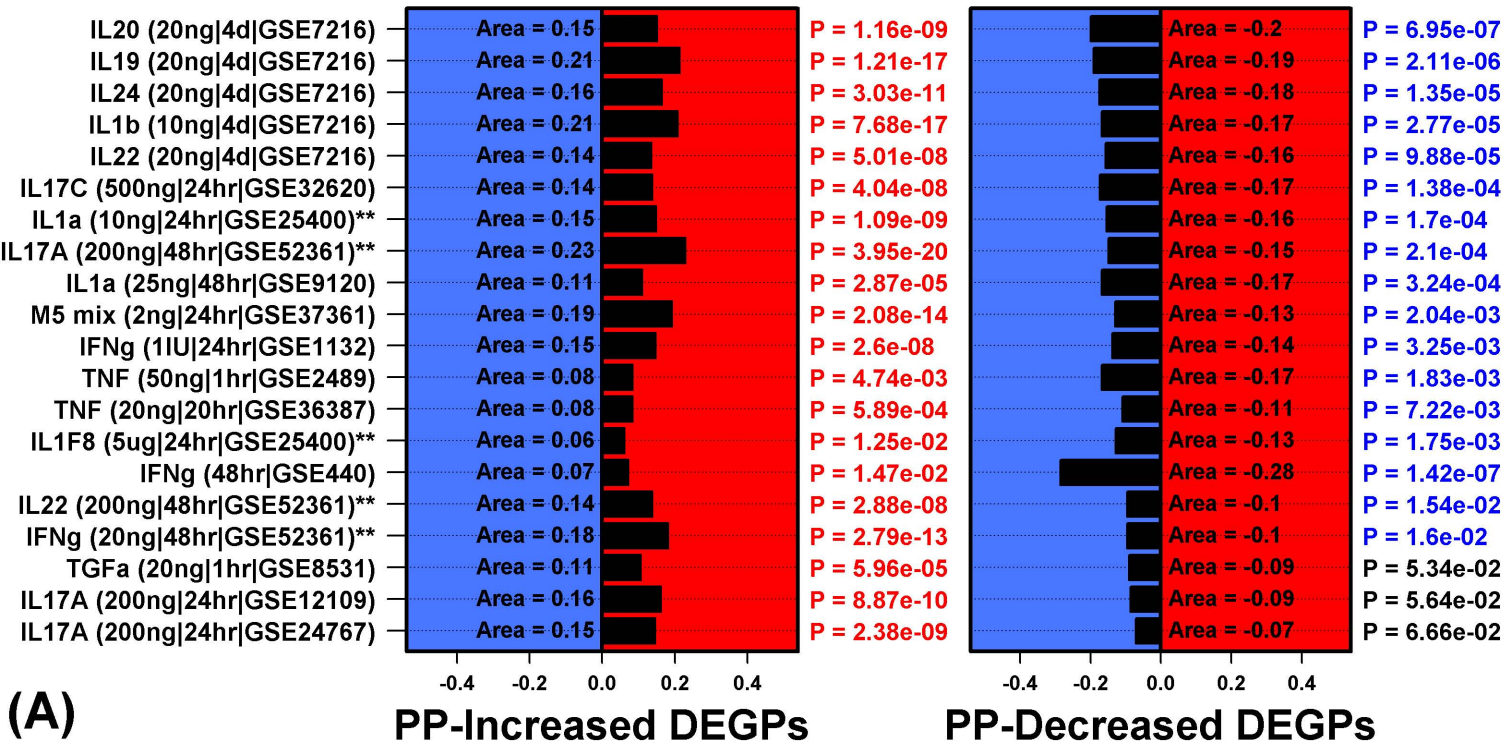

(A)

PP-Increased DEGPs

PP-Decreased DEGPs

# KC gene perturbations

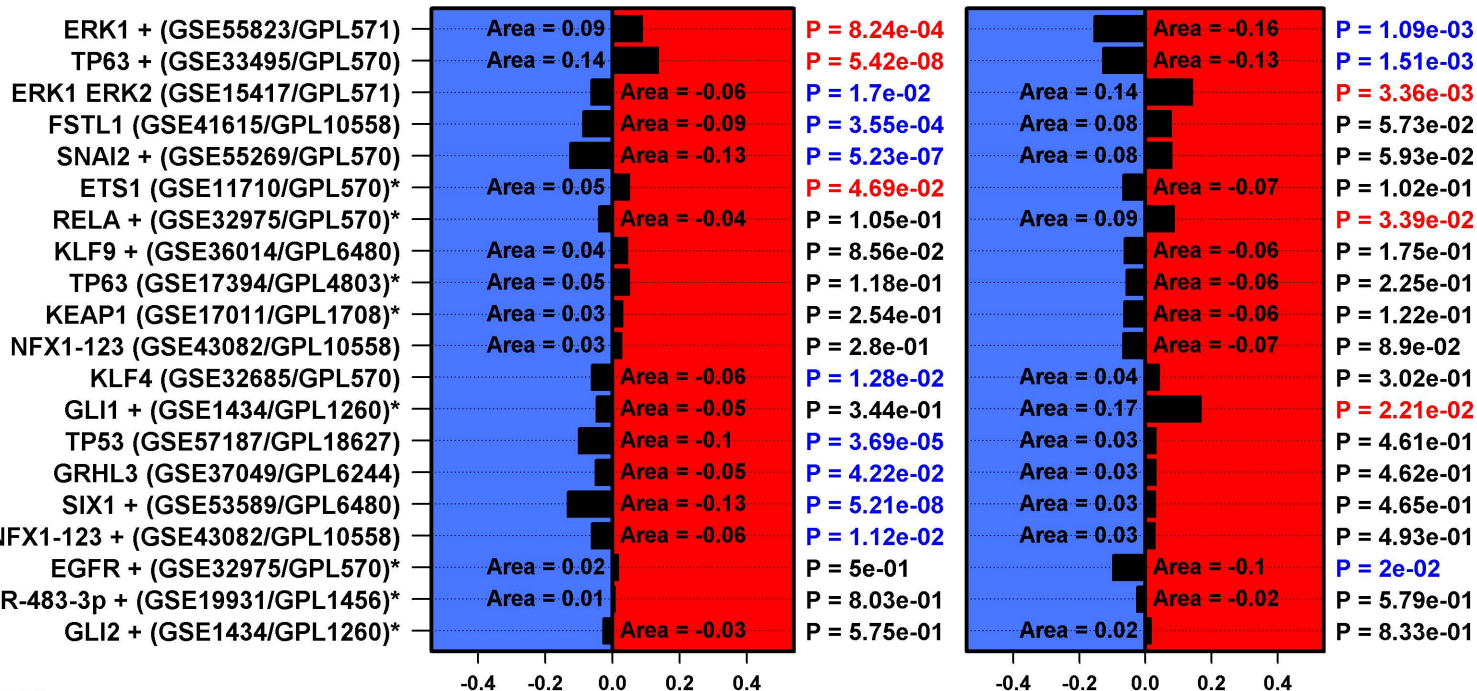

(B)

PP-Increased DEGPs

PP-Decreased DEGPs

# KC non-cytokine treatments

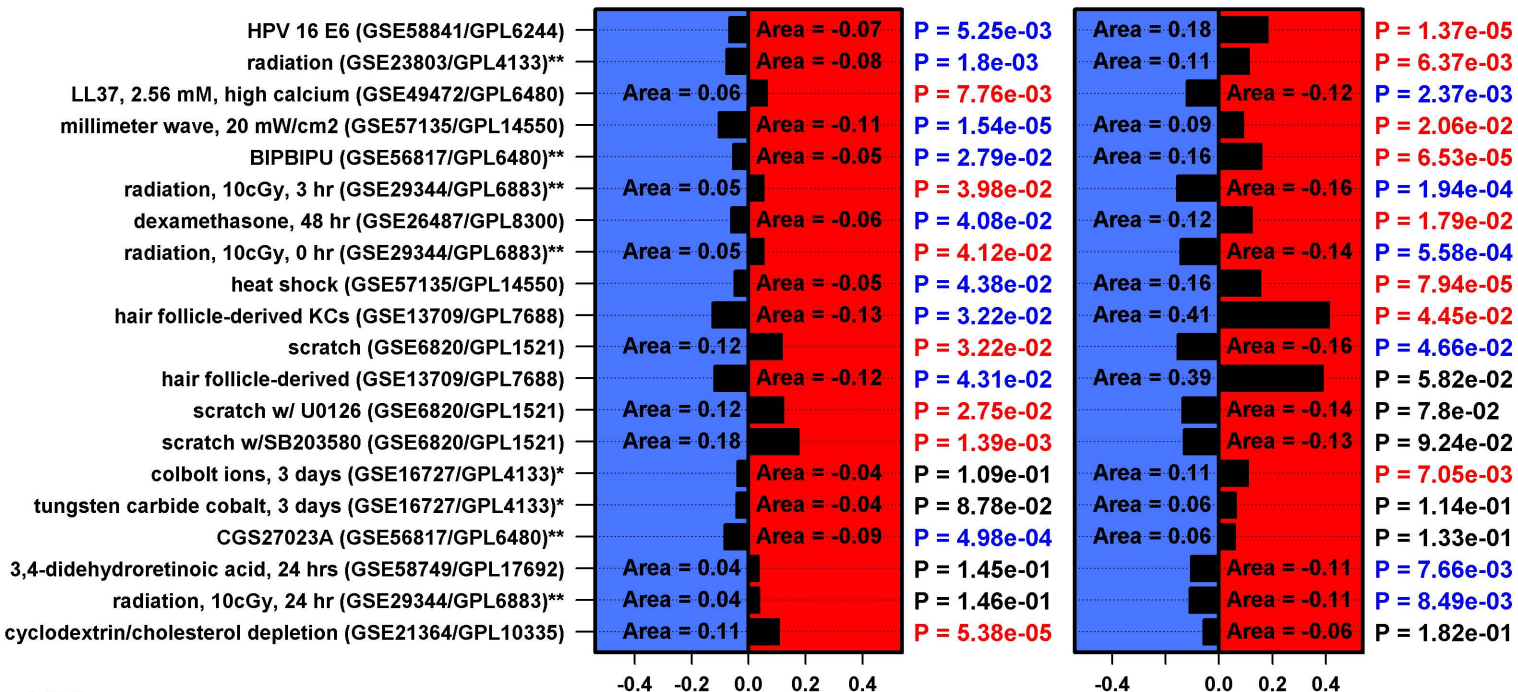

(C)

PP-Increased DEGs

PP-Decreased DEGs

# Fibroblast treatments

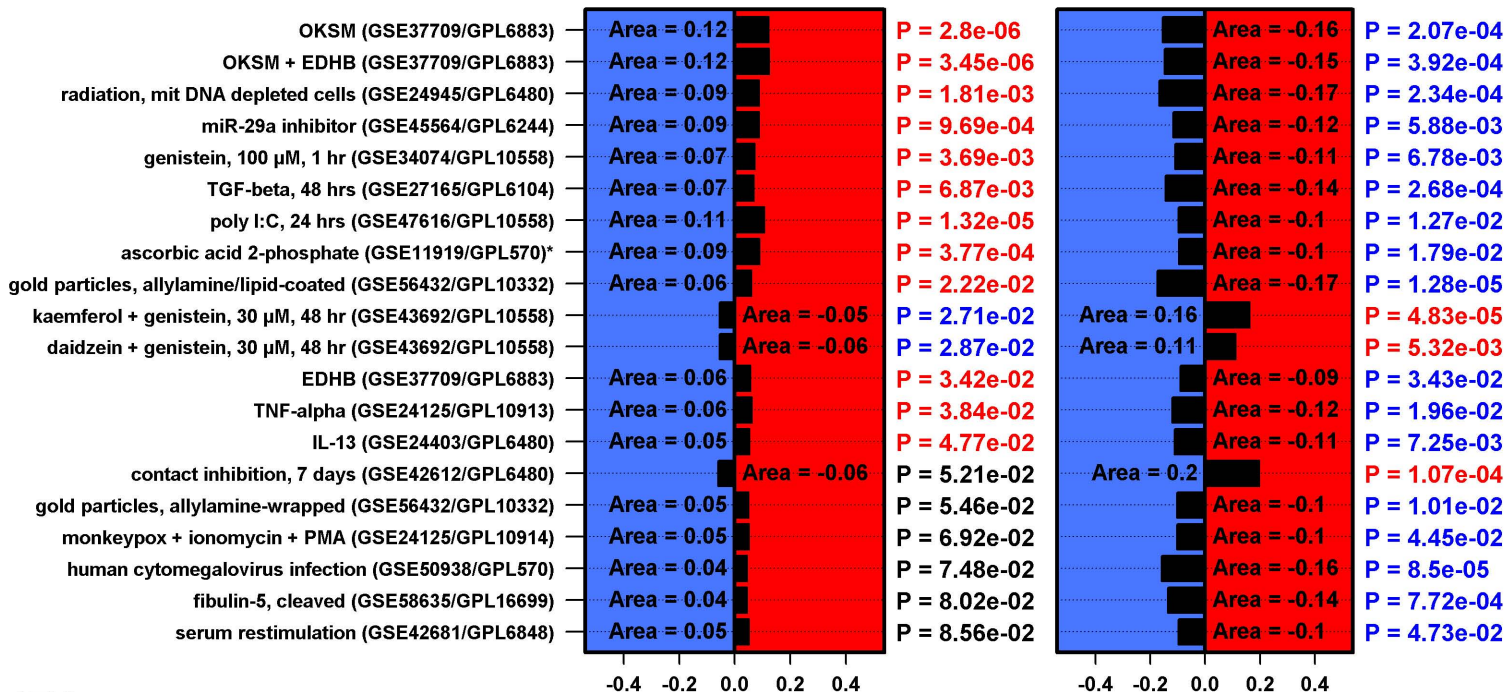

(D)

PP-Increased DEGPs      PP-Decreased DEGPs



# Psoriasis treatment responses

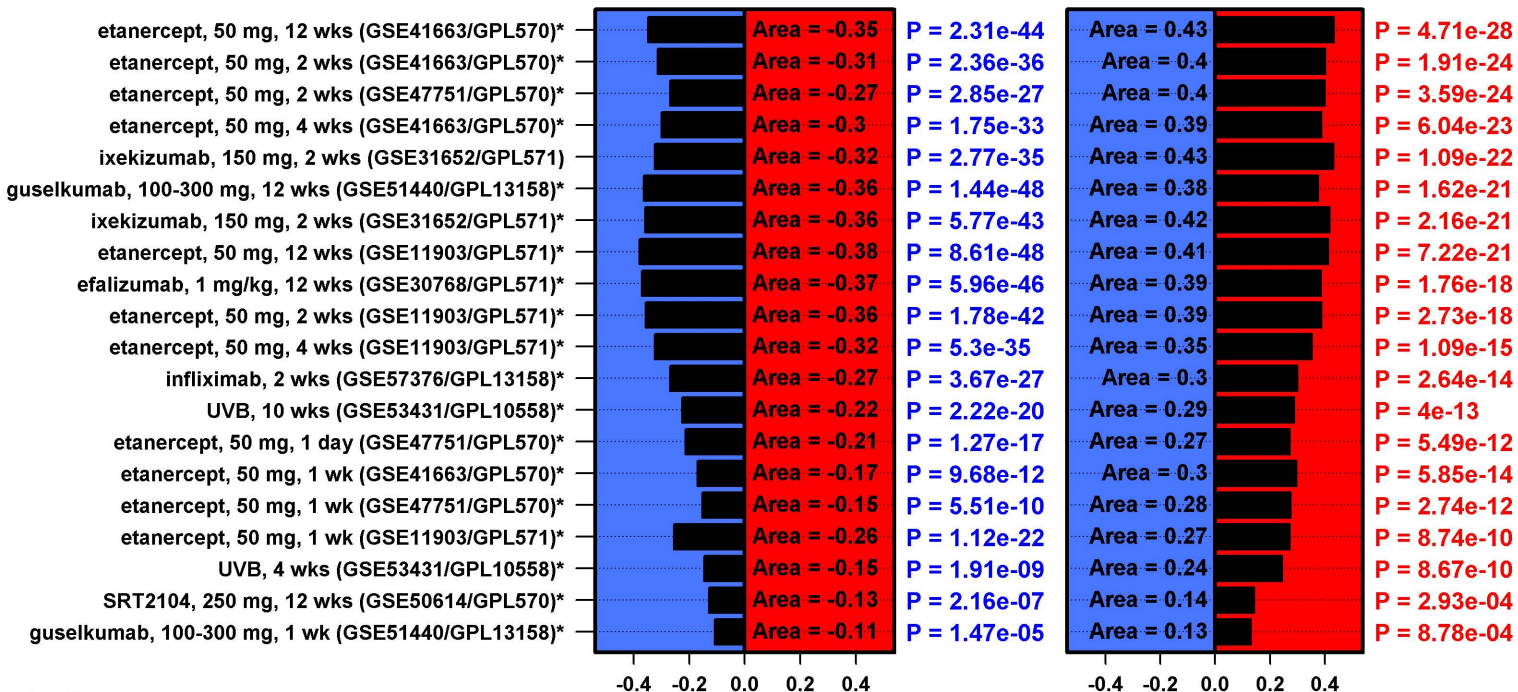

(E)

PP-Increased DEGs

PP-Decreased DEGs

# Mouse phenotypes

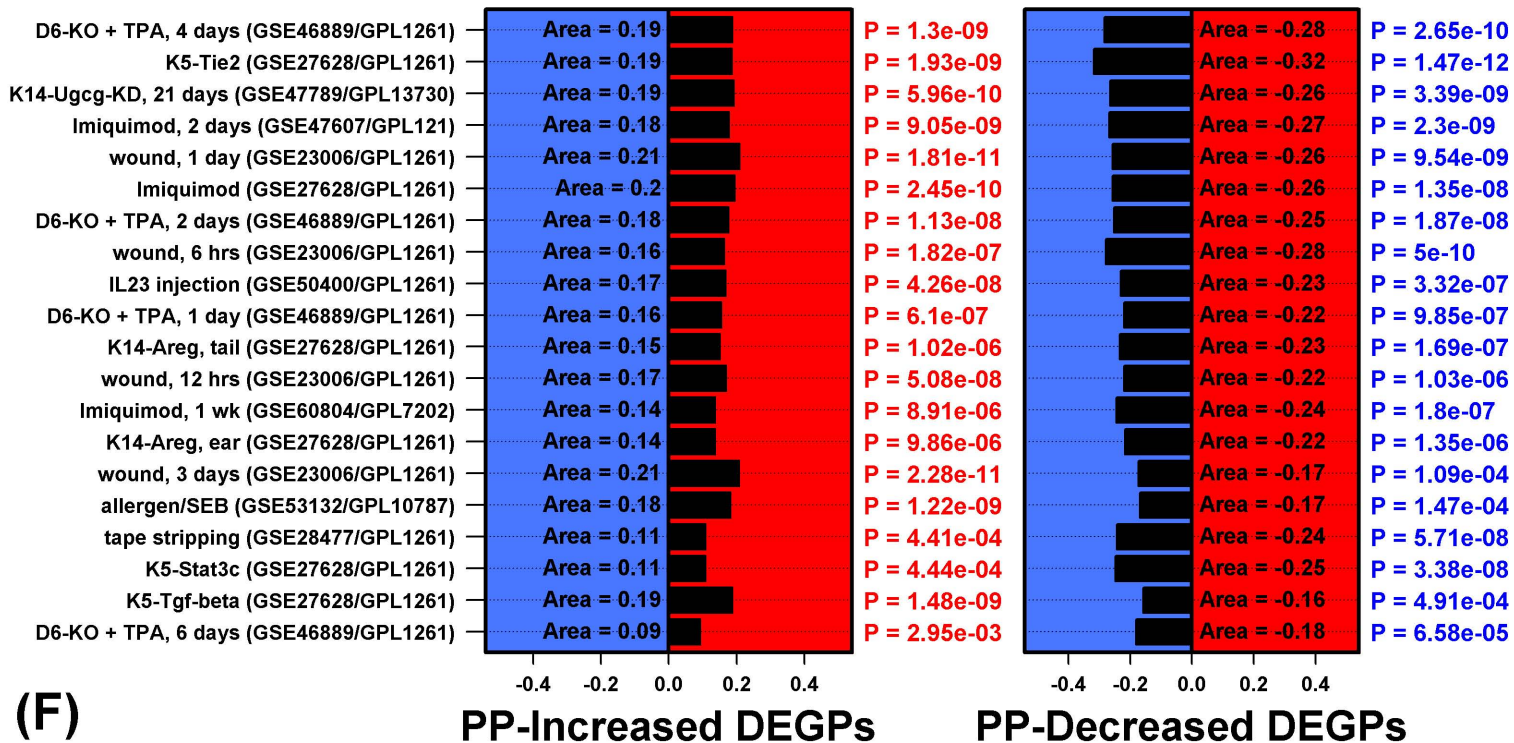

(F)

PP-Increased DEGs

PP-Decreased DEGs

# PBMC treatments

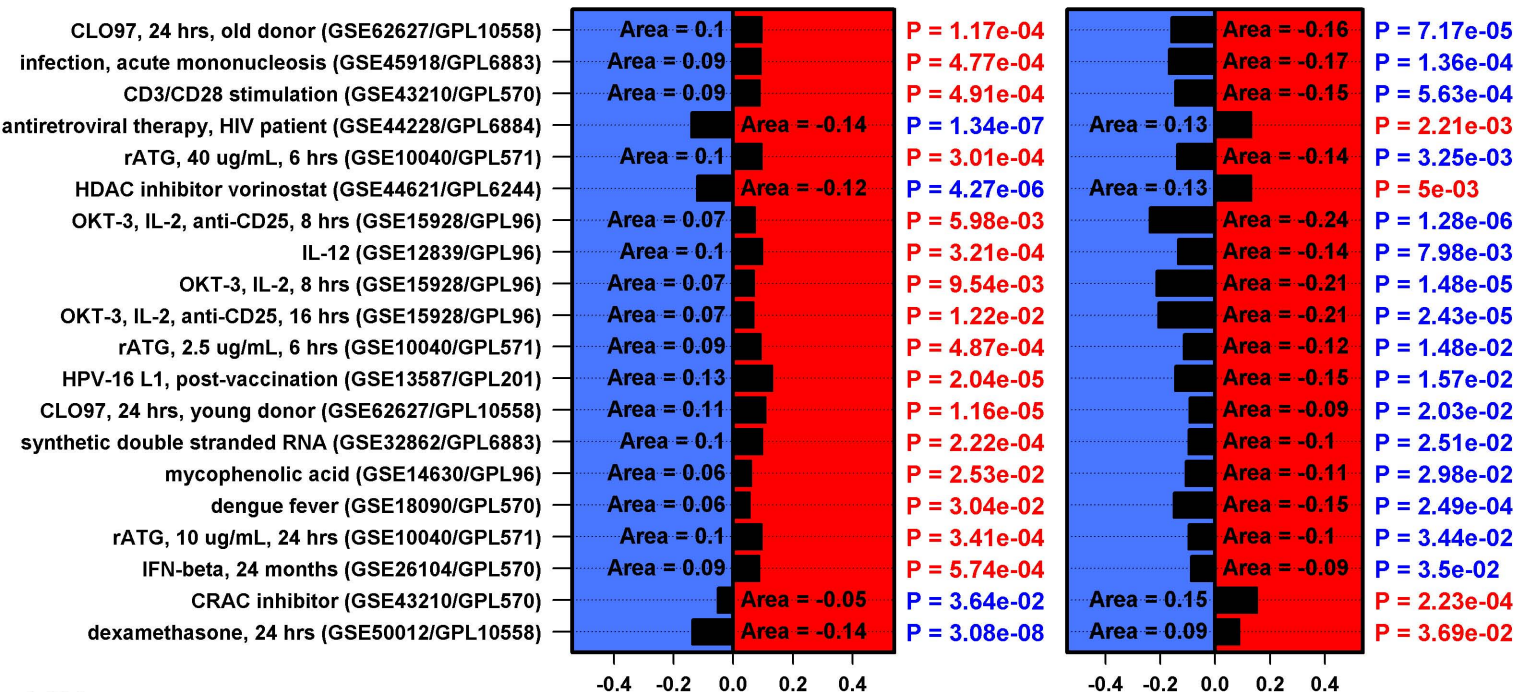

(G)

PP-Increased DEGs

PP-Decreased DEGs

# T-cell treatments

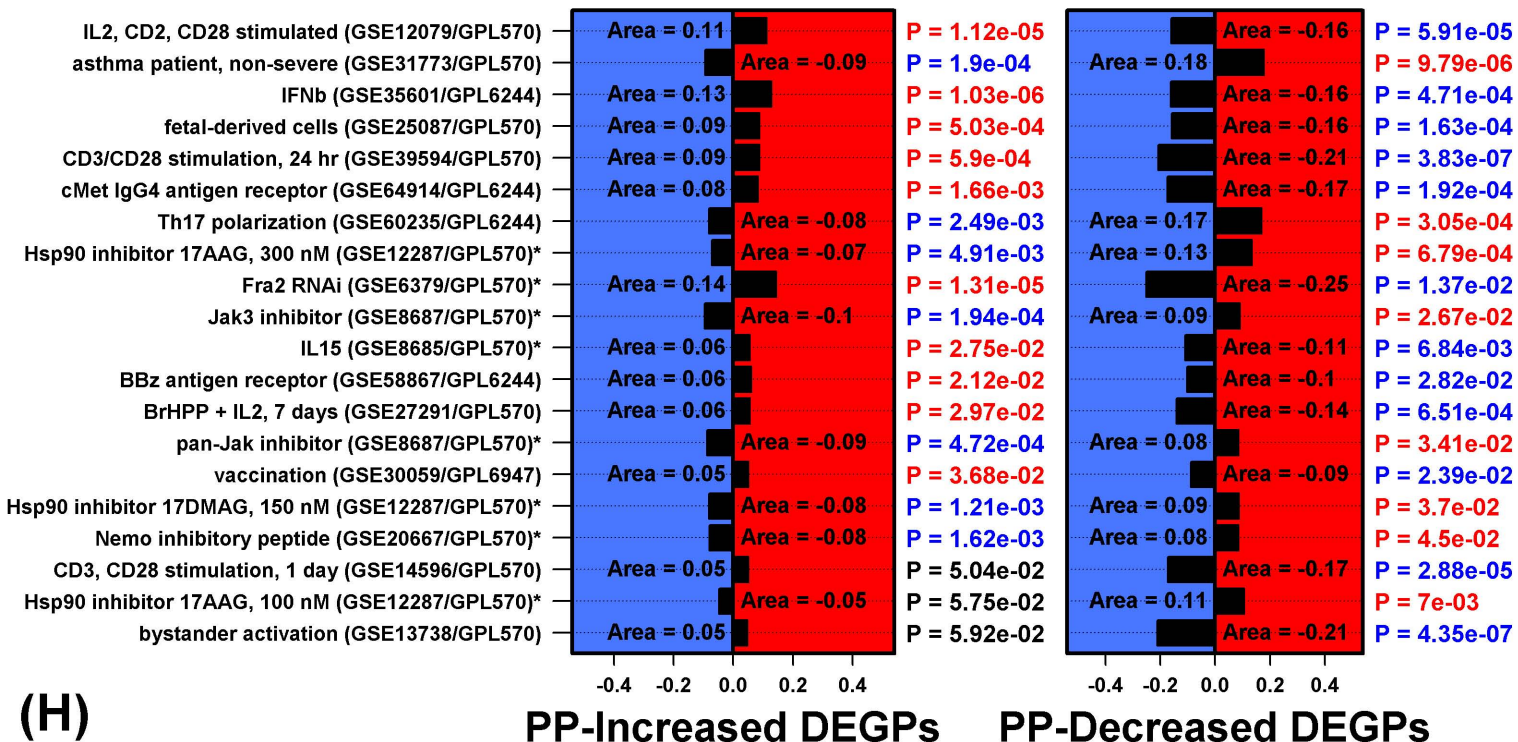

(H)

PP-Increased DEGs

PP-Decreased DEGs



# Dendritic cell treatments

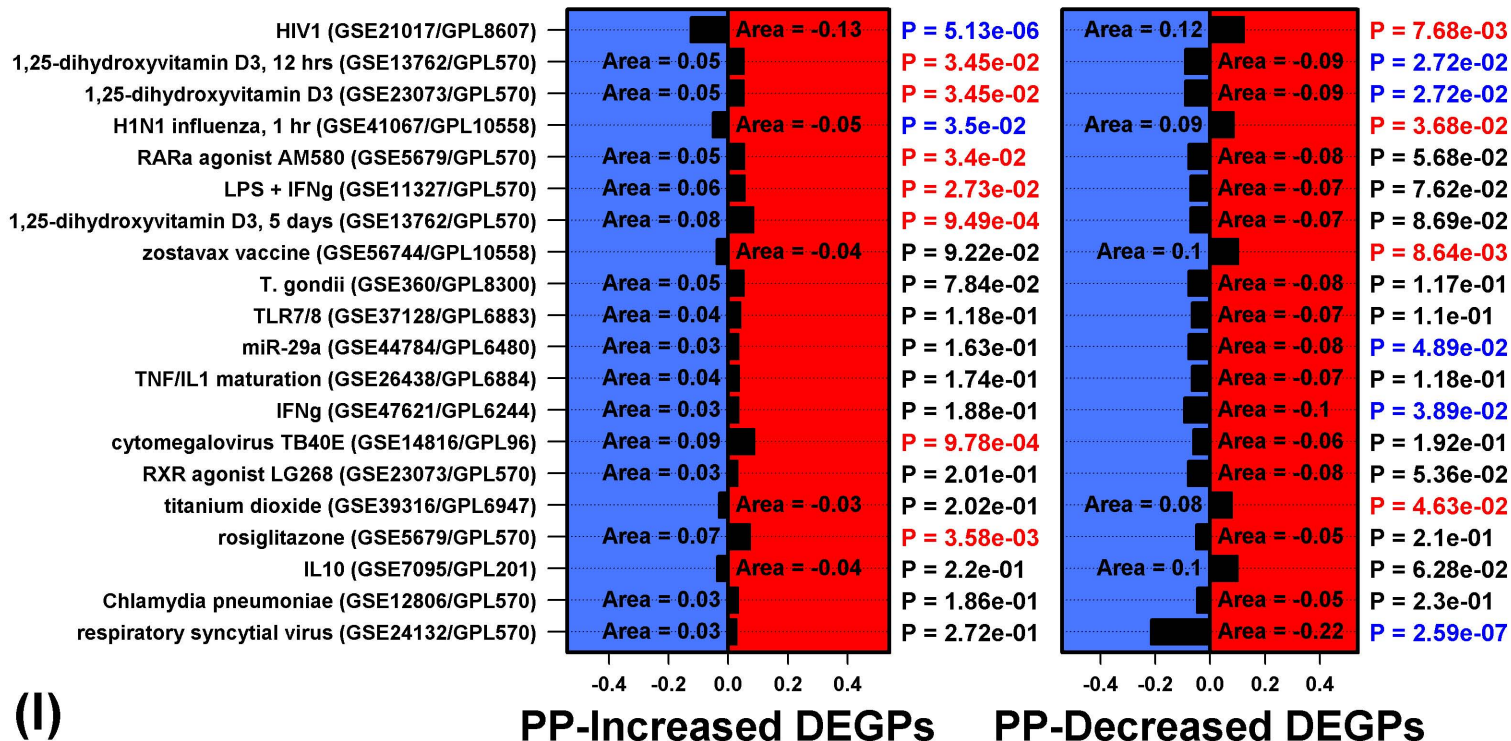

# Macrophage treatments

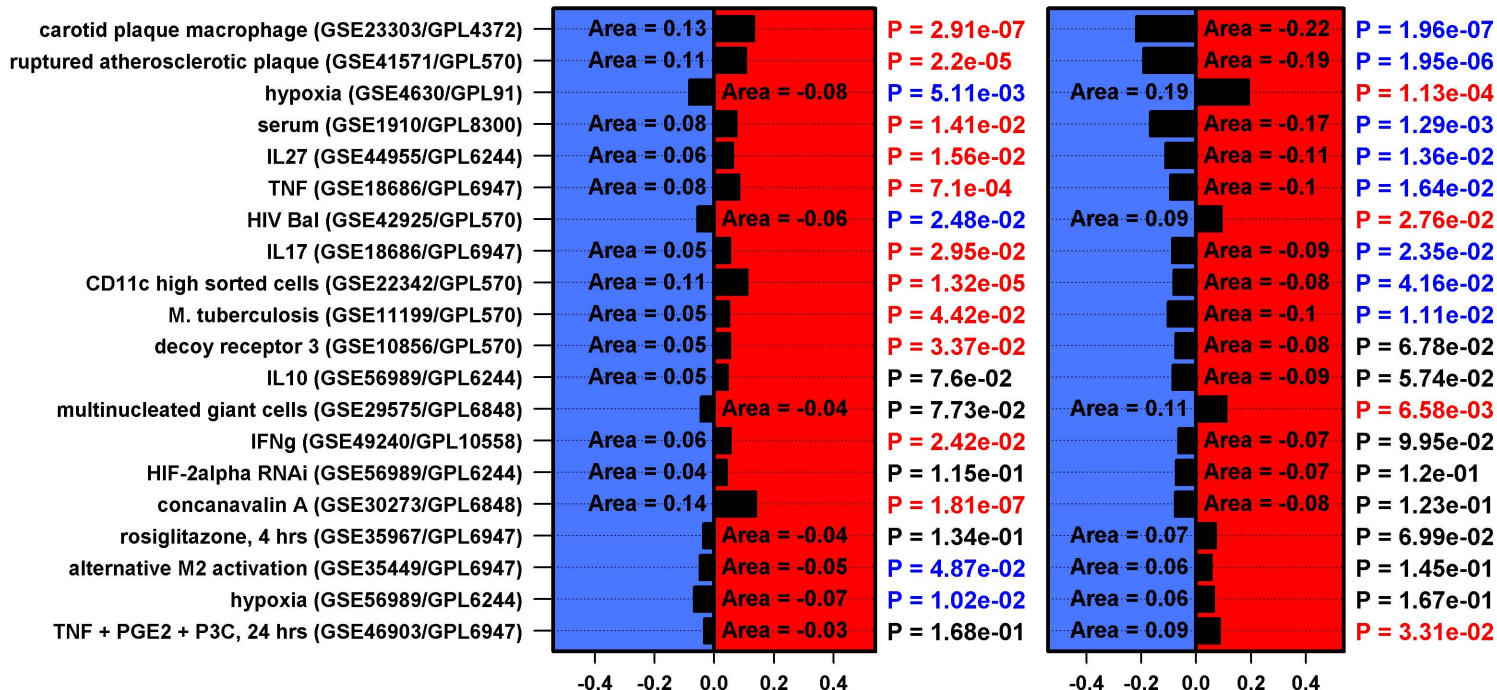

(J)

PP-Increased DEGs

PP-Decreased DEGs

# Human skin diseases

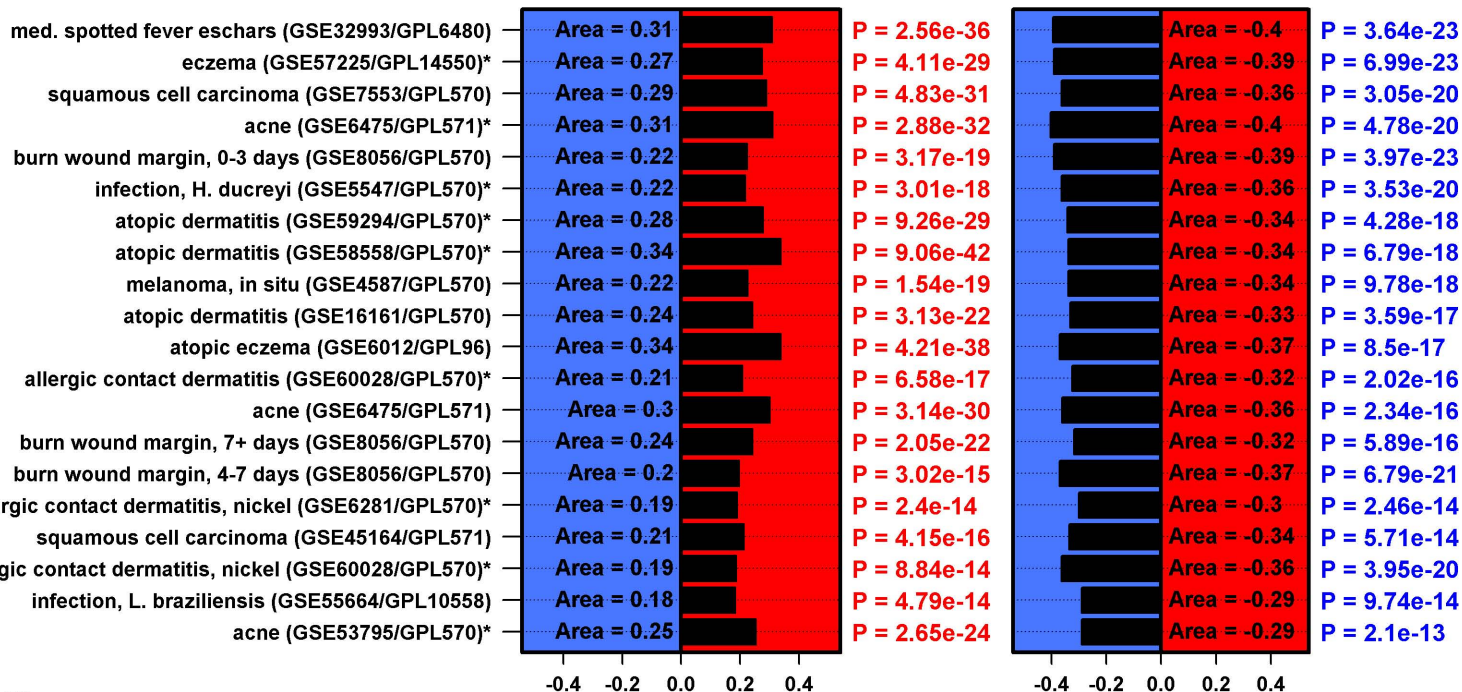

(K)

PP-Increased DEGs

PP-Decreased DEGs
